# Supplementary material for: Atomic and Microstructural Evolution of Mixed Spectrum Neutron-Irradiated Tungsten Alloys: Insights From Multimodal X-Ray Spectroscopy and Diffraction Characterization
Source: Research Square preprint supplement (doi:10.21203/rs.3.rs-8274574/v1), 2026-01-20
Supplement: Supplementary file 1 [file d67b7c0679bd3d61c4190f80.docx]

**ATOMIC AND MICROSTRUCTURAL EVOLUTION OF MIXED SPECTRUM NEUTRON-IRRADIATED TUNGSTEN ALLOYS: INSIGHTS FROM MULTIMODAL X-RAY SPECTROSCOPY AND DIFFRACTION CHARACTERIZATION** *#[[1]](#footnote-1)*

*D. J. Sprouster1*, T Koyanagi2, M. Ouyang1, W. Zhong2, D. Olds3, A. Hasegawa4, Y. Katoh2, L.L. Snead1,**5*

*1 Department of Materials Science and Chemical Engineering, Stony Brook University, Stony Brook, NY 11794, USA*

*2 Material Science and Technology Division, Oak Ridge National Laboratory, Oak Ridge, TN 37830, USA*

*3 National Synchrotron Light Source II, Brookhaven National Laboratory, Upton, NY 11973, USA 4Department of Quantum Science and Energy Engineering, Graduate School of Engineering, Tohoku University, 6-6-01-2, Aramaki-aza-Aoba, Aoba-ku, Sendai 980-8579, Japan*

*5 Nuclear Reactor Laboratory, Massachusetts Institute of Technology, Cambridge, MA 02139, USA*

*** [david.sprouster@stonybrook.edu](mailto:david.sprouster@stonybrook.edu)

**Supplementary Information**

The XANES spectra for the different phases simulated by FEFF are included in Figure S1, highlighting the spectral differences between the intermetallic phases.The quantitative microstructural parameters (microstrain, lattice parameters) determined from the XRD refinements are given in Table S1. The Re and Os fractions determined from the XANES analysis are also listed in Table S1 for reference.

**Figure S1 FEFF simulated XANES Spectra at (a) Re and (b) Os LIII Edges.**

Table 1. Rietveld refinement results - lattice parameters (a) and microstrain (μs) for all polycrystalline specimens. Baseline and Thermally Aged specimens are included for reference. Single crystal specimens are included at end of table with Re+Os % columns included.

| **Specimen** | **Condition** | **(a)** | **±** | **μs** | **±** | **Re** | **Os** |
| --- | --- | --- | --- | --- | --- | --- | --- |
| **ID** | Baseline, thermally aged, irradiation temp, fluence | Å |  | (arb units) |  | % |  |
| ***Polycrystalline W*** | ***Baseline*** | 3.16631 | 0.00000 | 0.1317 | 0.0010 | 0.00 | 0 |
|  | 850 °C, 0.42 dpa | 3.16697 | 0.00003 | 0.2618 | 0.0062 | 1.02 | 0.29 |
|  | 850 °C, 0.42 dpa | 3.16703 | 0.00003 | 0.2981 | 0.0036 | 1.87 | 0.20 |
|  | ***Thermally Aged*** | 3.16651 | 0.00000 | 0.1859 | 0.0010 | 0.00 |  |
|  | 1100 °C, 0.47 dpa | 3.16472 | 0.00004 | 0.5112 | 0.0059 | 1.33 | 0.31 |
|  | 1100 °C, 0.47 dpa | 3.16423 | 0.00002 | 0.4167 | 0.0045 | 2.18 | 0.25 |
| ***W-3%Re*** | ***Baseline*** | 3.16442 | 0.00001 | 0.2032 | 0.0010 | 3.05 |  |
|  | 850 °C, 0.42 dpa | 3.16645 | 0.00001 | 0.1812 | 0.0012 | 2.20 | 0.55 |
|  | 850 °C, 0.42 dpa | 3.16677 | 0.00001 | 0.1700 | 0.0022 | 3.17 | 0.66 |
|  | ***Thermally Aged*** | 3.16413 | 0.00001 | 0.1742 | 0.0009 | 3.05 |  |
|  | 1100 °C, 0.47 dpa | 3.16100 | 0.00002 | 0.2403 | 0.0027 | 2.43 | 0.61 |
|  | 1100 °C, 0.47 dpa | 3.16166 | 0.00001 | 0.1552 | 0.0011 | 3.16 | 0.77 |
| ***K-W*** | ***Baseline*** | 3.16901 | 0.00001 | 0.1874 | 0.0011 | 0.00 |  |
|  | 850 °C, 0.42 dpa | 3.16501 | 0.00002 | 0.1175 | 0.0078 | 1.87 | 0.22 |
|  | 850 °C, 0.42 dpa | 3.16484 | 0.00001 | 0.1469 | 0.0013 | 2.05 | 0.20 |
|  | ***Thermally Aged*** | 3.16463 | 0.00001 | 0.1032 | 0.0021 | 0.00 |  |
|  | 1100 °C, 0.47 dpa | 3.16376 | 0.00001 | 0.3503 | 0.0031 | 1.18 | 0.32 |
| ***K-W-3%Re*** | ***Baseline*** | 3.16639 | 0.00001 | 0.1735 | 0.0011 | 2.92 |  |
|  | 850 °C, 0.42 dpa | 3.16178 | 0.00000 | 0.1820 | 0.0009 | 3.15 | 0.68 |
|  | 850 °C, 0.42 dpa | 3.16264 | 0.00001 | 0.1414 | 0.0012 | 3.33 | 0.69 |
|  | ***Thermally Aged*** | 3.16307 | 0.00001 | 0.1393 | 0.0015 | 2.92 |  |
|  | 1100 °C, 0.47 dpa | 3.16108 | 0.00001 | 0.2099 | 0.0019 | 2.73 | 0.54 |
| ***1%La W-3%Re*** | ***Baseline*** | 3.16668 | 0.00001 | 0.2280 | 0.0010 | 2.68 |  |
|  | 850 °C, 0.42 dpa | 3.16234 | 0.00001 | 0.2126 | 0.0010 | 3.20 | 0.80 |
|  | 850 °C, 0.42 dpa | 3.16351 | 0.00001 | 0.1888 | 0.0012 | 3.39 | 0.69 |
|  | ***Thermally Aged*** | 3.16330 | 0.00001 | 0.1563 | 0.0014 | 2.80 |  |
|  | 1100 °C, 0.47 dpa | 3.16053 | 0.00000 | 0.1551 | 0.0009 | 2.02 | 0.90 |
|  | 1100 °C, 0.47 dpa | 3.16036 | 0.00001 | 0.1697 | 0.0012 | 3.24 | 0.70 |
| ***Single Crystal W*** | ***baseline*** | nm |  | nm |  | 0.00 |  |
|  | 850 °C, 0.42 dpa | nm |  | nm |  | 0.44 | 0.26 |
|  | 850 °C, 0.42 dpa | nm |  | nm |  | 2.02 | 0.22 |
|  | 1100 °C, 0.47 dpa | nm |  | nm |  | 1.02 | 0.49 |
|  | 1100 °C, 0.47 dpa | nm |  | nm |  | 2.02 | 0.32 |

1. Notice: This manuscript has been co-authored by UT-Battelle, LLC, under contract DE-AC05-00OR22725 with the US Department of Energy (DOE). The US government retains and the publisher, by accepting the article for publication, acknowledges that the US government retains a nonexclusive, paid-up, irrevocable, worldwide license to publish or reproduce the published form of this manuscript, or allow others to do so, for US government purposes. DOE will provide public access to these results of federally sponsored research in accordance with the DOE Public Access Plan ([https://www.energy.gov/doe-public-access-plan](https://protect.checkpoint.com/v2/r01/___https:/www.energy.gov/doe-public-access-plan___.YzJ1OnN0b255YnJvb2s6YzpnOmUzZDRjYjg0NjNjZGQ5MGQzZThkZGU1YzgzY2I1MjRhOjc6YjA0NjplOTcwMjQ0MWQzZDkwZjUyYzFjY2Y5MjEyZGEwOWQ3M2YwMDA0NjBkYzUwZjA5OTY3MTg0OWYzZjkyMzI3YTBiOnA6VDpG)). [↑](#footnote-ref-1)
